# Supplementary material
Source: HighWire-hosted journal article supplement (http://www.jrheum.org/highwire/filestream/29754/field_highwire_adjunct_files/0/150162DataSuppl.pdf)
Supplement: 150162DataSuppl.pdf [file 150162DataSuppl.pdf]

## ONLINE SUPPLEMENTARY DATA

**Supplementary Table 1: Demographic and clinical characteristics of DISH patients (n=15).**

| Age (years) | Gender | Symptom duration (years) | Metabolic parameters                                                           | ESR   | CRP (mg/l) | HLA-B27  | BMI (kg/m <sup>2</sup> ) | Radiological assessment* (0-10) |
|-------------|--------|--------------------------|--------------------------------------------------------------------------------|-------|------------|----------|--------------------------|---------------------------------|
| 42.8        | female | 1                        | obesity, hypercholesterolemia, hypothyroidism                                  | 35    | 4.3        | negative | 43.9                     | 1                               |
| 51.9        | female | 4                        | obesity, hypertriglyceridemia, hypothyroidism                                  | 3     | 0.1        | negative | 28.6                     | 1                               |
| 59.3        | male   | 20                       | obesity, hypertension, hypercholesterolemia.                                   | 2     | 3.5        | negative | 29.1                     | 3                               |
| 60.9        | male   | 10                       | hypercholesterolemia                                                           | 2     | 0.1        | negative | 25.6                     | 8                               |
| 63.2        | male   | 4                        | obesity, hypertension, familial diabetes mellitus                              | 2     | 1.5        | negative | 27.7                     | 2                               |
| 63.6        | male   | 10                       | obesity, hypertension, hypercholesterolemia, diabetes mellitus                 | 34    | 2.8        | n.a.*    | 36.3                     | 1                               |
| 64.5        | male   | 14                       | hyperuricemia                                                                  | 14    | 5.6        | negative | 24.8                     | 1                               |
| 64.5        | male   | 11                       | obesity, hypertension, diabetes mellitus                                       | 31    | 4.4        | negative | 28.7                     | 3                               |
| 69.2        | male   | 40                       | obesity, hypertension, hypercholesterolemia, diabetes mellitus                 | 8     | 0.1        | negative | 32.7                     | 4.5                             |
| 69.7        | female | 10                       | obesity, hypertension                                                          | 10    | 4.4        | negative | 35.7                     | 4                               |
| 71.3        | male   | 30                       | obesity, hypertension, hypercholesterolemia, diabetes mellitus                 | 6     | 0.8        | negative | 30.8                     | 2                               |
| 71.8        | male   | 13                       | hyperuricemia, hyperglycemia                                                   | 4     | 1.4        | n.a.*    | 25.6                     | 2                               |
| 72.5        | female | 4                        | hypertension, hypercholesterolemia, hyperthyroidism                            | 14    | 3.6        | negative | 26.4                     | 4                               |
| 78.2        | female | 15                       | obesity, hypertension, hypercholesterolemia, diabetes mellitus, hypothyroidism | n.a.* | 5          | n.a.*    | 28.7                     | 1                               |
| 85.3        | female | 5                        | hypertension                                                                   | n.a.* | 12.9       | negative | 22.5                     | 1                               |

\*Radiological assessment: Score 0-10 (0=no doubt of DISH, 10=no doubt of AS) (14), n.a.\*= not available

**Supplementary Table 2: Demographic and clinical characteristics of AS patients (n=33).**

| Age (years) | Gender | Symptom duration (years) | BASDAI | BASFI | BASMI | Physician global assessment (0-10) | ESR (mm/h) | CRP (mg/l) | HLA- B27 | BMI (kg/m <sup>2</sup> ) | Classification of AS   | Number of syndesm on plain x-ray | Radiological assessment* |
|-------------|--------|--------------------------|--------|-------|-------|------------------------------------|------------|------------|----------|--------------------------|------------------------|----------------------------------|--------------------------|
| 42.9        | female | 27                       | 9.4    | 9.6   | 3     | 5                                  | 34         | 9          | positive | 38.8                     | Ankylosing Spondylitis | 1                                | 10                       |
| 45          | female | 28                       | 6.4    | 7     | 4     | 6                                  | 10         | 2          | positive | 19.8                     | Ankylosing Spondylitis | 0                                | 10                       |
| 45.3        | male   | 15                       | 6.1    | 3     | 5.4   | 9                                  | 29         | 42         | positive | 22.3                     | Ankylosing Spondylitis | 0                                | 10                       |
| 45.6        | female | 26                       | 6.2    | 2.3   | 2     | 3                                  | 20         | 4          | positive | 27.2                     | Ankylosing Spondylitis | 0                                | 10                       |
| 45.7        | male   | 31                       | 2      | 0.9   | 1     | 1                                  | 12         | 5          | positive | 20.5                     | Ankylosing Spondylitis | 1                                | 10                       |
| 46.5        | male   | 6                        | 6.8    | 5.9   | 0     | 5                                  | 48         | 22.5       | positive | 23.7                     | Ankylosing Spondylitis | 0                                | 10                       |
| 46.9        | female | 17                       | 6.7    | 2.1   | 1     | 3                                  | 7          | 15         | negative | 28.3                     | Crohn's disease        | 0                                | 10                       |
| 47.2        | male   | 13                       | 7      | 7.8   | 1     | 7                                  | 64         | 50         | positive | 26.9                     | Ankylosing Spondylitis | 1                                | 10                       |
| 47.3        | male   | 12                       | 4      | 0.6   | 1     | 4                                  | 16         | 5          | negative | 22.2                     | Crohn's disease        | 1                                | 10                       |
| 47.3        | male   | 24                       | 6.3    | 5.4   | 4     | 5                                  | 4          | 2.2        | positive | 37.1                     | psoriatic arthritis    | 0                                | 8                        |
| 47.6        | male   | 32                       | 0.4    | 0.1   | 0     | 1                                  | 4          | 1          | positive | 24.6                     | Ankylosing Spondylitis | 1                                | 10                       |
| 47.8        | male   | 15                       | 5.4    | 4.3   | 5     | 3                                  | 62         | 38         | positive | 25.4                     | Ankylosing Spondylitis | 1                                | 10                       |
| 47.9        | male   | 24                       | 5.6    | 5.6   | 2     | 5                                  | 42         | 40         | positive | 26.2                     | Ankylosing Spondylitis | 0                                | 10                       |
| 49.3        | male   | 31                       | 4.5    | 3.5   | 2     | 7                                  | 13         | 8          | positive | 30.5                     | Ankylosing Spondylitis | 0                                | 10                       |
| 50          | female | 13                       | 7.1    | 5.4   | 4     | 5                                  | 10         | 1          | positive | 18.8                     | Ankylosing Spondylitis | 0                                | 10                       |
| 51.1        | male   | 28                       | 3.8    | 2.2   | 5     | 6                                  | 3          | 0          | positive | 22.3                     | Ankylosing Spondylitis | 1                                | 10                       |
| 51.7        | male   | 21                       | 8.4    | 7.8   | 3     | 6                                  | 17         | 38         | negative | 38.8                     | Ankylosing Spondylitis | 0                                | 10                       |
| 52.9        | male   | 37                       | 2.8    | 6.6   | 9     | 3                                  | 29         | 29         | positive | 22.8                     | Crohn's disease        | 1                                | 10                       |
| 53          | male   | 31                       | 6.3    | 4.8   | 2     | 4                                  | 9          | 19         | positive | 27.1                     | Ankylosing Spondylitis | 1                                | 10                       |
| 53          | female | 10                       | 4      | 5.5   | 1     | 4                                  | 38         | 1          | positive | 21.9                     | Ankylosing Spondylitis | 0                                | 10                       |
| 53.6        | male   | 32                       | 4.1    | 4.6   | 3     | 4                                  | 6          | 3          | positive | 27                       | Ankylosing Spondylitis | 1                                | 10                       |
| 54.6        | male   | 15                       | 8.6    | 7.9   | 2     | 10                                 | 104        | 90         | positive | 28.7                     | Crohn's disease        | 1                                | 7                        |
| 54.9        | male   | 7                        | 3.6    | 2.8   | 2     | 4                                  | 47         | 36         | negative | 31                       | Ankylosing Spondylitis | 0                                | 10                       |

|      |        |    |     |     |   |   |    |    |          |      |                        |   |    |
|------|--------|----|-----|-----|---|---|----|----|----------|------|------------------------|---|----|
| 55.4 | male   | 38 | 6.3 | 3.3 | 4 | 5 | 24 | 2  | negative | 29.4 | Ankylosing Spondylitis | 1 | 10 |
| 57.3 | male   | 32 | 5.7 | 6.8 | 8 | 3 | 20 | 16 | positive | 23.9 | Ankylosing Spondylitis | 1 | 10 |
| 59.8 | male   | 33 | 4.4 | 4.4 | 3 | 3 | 16 | 2  | positive | 23.1 | Ankylosing Spondylitis | 0 | 8  |
| 60   | female | 41 | 3.3 | 3.8 | 6 | 7 | 69 | 26 | positive | 17.8 | Ankylosing Spondylitis | 1 | 10 |
| 61.4 | male   | 31 | 3.3 | 5.5 | 5 | 5 | 11 | 3  | positive | 27.4 | Ankylosing Spondylitis | 1 | 10 |
| 62.6 | male   | 46 | 6   | 5.2 | 4 | 3 | 4  | 6  | positive | 27   | Ankylosing Spondylitis | 1 | 10 |
| 65.5 | male   | 23 | 3   | 6   | 7 | 5 | 39 | 23 | positive | 32.7 | Ankylosing Spondylitis | 1 | 10 |
| 67.4 | male   | 39 | 4.7 | 1.6 | 2 | 3 | 23 | 19 | positive | 26   | Ankylosing Spondylitis | 1 | 10 |
| 71.6 | male   | 37 | 4.7 | 5.5 | 7 | 4 | 6  | 5  | negative | 24.4 | psoriatic arthritis    | 1 | 10 |
| 72   | female | 42 | ND  | ND  | 2 | 4 | 14 | 1  | positive | 24.4 | Ankylosing Spondylitis | 0 | 8  |

BASDAI= Bath Ankylosing Spondylitis Disease Activity Index

BASFI= Bath Ankylosing Spondylitis Functional Index

BASMI= Bath Ankylosing Spondylitis Metrology Index

ESR=erythrocyte sedimentation rate

CRP=c-reactive protein

BMI=body mass index

\*Radiological assessment: Score 0-10 (0=no doubt of DISH, 10=no doubt of AS) (14)

**Supplementary Table 3: wbMR findings in DISH patients.**

| location | u-acil,lil | u-pcil,lil | l-acil,lil | l-pcil,lil | u-afat | u-pfat | l-afat | l-pfat | nank | nil | pil | fil | fank | sij edema | sij fat infiltr | sij ankyl | m edema | m erosion | m ankyl |
|----------|------------|------------|------------|------------|--------|--------|--------|--------|------|-----|-----|-----|------|-----------|-----------------|-----------|---------|-----------|---------|
| C2       |            |            |            |            |        |        | 4      |        | 1    |     |     |     | 1    |           |                 |           |         |           |         |
| C3       |            |            |            |            |        |        | 4      |        | 1    |     |     | 1   | 1    |           |                 |           |         |           |         |
| C4       |            |            |            |            |        |        | 1      |        | 1    |     |     | 1   | 1    |           |                 |           |         |           |         |
| C5       |            |            | 2          | 2          | 1      |        | 2      | 2      | 1    | 1   |     |     | 1    |           |                 |           |         |           |         |
| C6       | 2          | 1          | 1          | 1          | 2      | 3      |        |        |      | 1   |     | 1   |      |           |                 |           |         |           |         |
| C7       | 1          | 1          |            |            | 1      | 1      |        |        |      | 1   |     | 1   |      |           |                 |           |         |           |         |
| Th1      |            |            | 1          |            |        |        |        |        |      |     |     |     |      |           |                 |           |         |           |         |
| Th2      | 1          |            |            |            |        |        |        |        |      |     |     |     |      |           |                 |           |         |           |         |
| Th3      | 1          |            | 3          |            |        |        | 2      |        |      |     |     | 1   |      |           |                 |           |         |           |         |
| Th4      | 3          |            | 1          |            | 2      |        | 2      |        |      |     |     |     |      |           |                 |           |         |           |         |
| Th5      | 1          |            | 1          |            | 2      |        | 2      |        |      |     |     |     |      |           |                 |           |         |           |         |
| Th6      | 1          |            | 2          |            | 1      |        | 1      |        |      | 1   | 1   |     |      |           |                 |           |         |           |         |
| Th7      | 2          |            |            |            | 1      |        | 1      |        |      | 1   | 1   |     |      |           |                 |           |         |           |         |
| Th8      |            |            |            |            | 1      |        | 1      |        |      |     |     |     |      |           |                 |           |         |           |         |
| Th9      |            |            |            |            | 1      |        | 2      |        |      |     |     |     |      |           |                 |           |         |           |         |
| Th10     |            |            | 1          | 1          | 2      |        |        |        |      |     |     |     |      |           |                 |           |         |           |         |
| Th11     | 1          |            |            |            |        |        | 1      |        |      |     |     |     |      |           |                 |           |         |           |         |
| Th12     |            |            | 5          |            | 1      |        | 5      |        |      | 1   |     |     |      |           |                 |           |         |           |         |
| L1       | 1          |            | 1          |            | 3      |        | 3      | 2      |      | 1   |     |     |      |           |                 |           |         |           |         |
| L2       | 2          | 1          |            |            | 3      | 1      | 2      | 3      |      |     |     |     |      |           |                 |           |         |           |         |
| L3       |            |            | 2          | 1          | 3      | 3      | 1      | 2      |      |     |     |     |      |           |                 |           |         |           |         |
| L4       | 3          | 1          | 2          |            | 4      | 2      | 1      | 2      |      |     |     | 1   |      |           |                 |           |         |           |         |
| L5       | 4          |            |            |            | 1      | 2      | 4      | 2      |      |     |     | 1   |      |           |                 |           |         |           |         |
| S1       |            |            |            |            | 3      | 2      | 1      |        |      |     |     |     |      |           |                 |           |         |           |         |
| rsupil   |            |            |            |            |        |        |        |        |      |     |     |     |      |           |                 |           |         |           |         |
| rinfil   |            |            |            |            |        |        |        |        |      |     |     |     |      |           |                 | 1         |         |           |         |
| rsupsac  |            |            |            |            |        |        |        |        |      |     |     |     |      | 4         | 1               |           |         |           |         |
| rinsac   |            |            |            |            |        |        |        |        |      |     |     |     |      | 3         | 1               | 1         |         |           |         |
| lsupil   |            |            |            |            |        |        |        |        |      |     |     |     |      | 1         |                 |           |         |           |         |
| linfil   |            |            |            |            |        |        |        |        |      |     |     |     |      |           |                 |           |         |           |         |
| lsupsac  |            |            |            |            |        |        |        |        |      |     |     |     |      | 2         |                 |           |         |           |         |

|           |  |  |  |  |  |  |  |  |  |  |  |  |  |  |  |  |  |   |  |   |
|-----------|--|--|--|--|--|--|--|--|--|--|--|--|--|--|--|--|--|---|--|---|
| linsac    |  |  |  |  |  |  |  |  |  |  |  |  |  |  |  |  |  |   |  |   |
| manubrium |  |  |  |  |  |  |  |  |  |  |  |  |  |  |  |  |  | 1 |  | 1 |

**Supplementary Table 4: wbMR findings in AS patients.**

| location | u-acil,lil | u-pcil,lil | l-acil,lil | l-pcil,lil | u-afat | u-pfat | l-afat | l-pfat | nank | nil | pil | fil | fank | sij edema | sij fat infiltr | sij ankyl | m edema | m erosion | m ankyl |
|----------|------------|------------|------------|------------|--------|--------|--------|--------|------|-----|-----|-----|------|-----------|-----------------|-----------|---------|-----------|---------|
| C2       |            |            | 1          | 1          | 1      |        | 14     |        | 1    |     |     | 2   | 4    |           |                 |           |         |           |         |
| C3       | 1          | 1          |            |            | 6      |        | 10     | 1      | 1    | 1   |     | 1   | 4    |           |                 |           |         |           |         |
| C4       |            |            | 1          | 2          | 7      |        | 6      |        | 2    | 1   |     | 1   | 3    |           |                 |           |         |           |         |
| C5       | 1          | 1          | 1          | 1          | 3      |        | 5      | 3      | 1    |     |     | 1   | 3    |           |                 |           |         |           |         |
| C6       | 1          | 1          |            | 2          | 4      | 2      | 4      | 2      | 1    | 1   |     |     | 3    |           |                 |           |         |           |         |
| C7       |            | 2          | 3          | 1          | 3      | 2      | 3      | 2      | 1    |     |     | 1   | 3    |           |                 |           |         |           |         |
| Th1      | 3          | 1          | 3          | 3          | 2      | 2      | 7      | 4      | 1    |     |     | 3   | 4    |           |                 |           |         |           |         |
| Th2      | 3          | 2          | 3          | 4          | 6      | 3      | 4      | 2      | 1    |     |     | 1   | 4    |           |                 |           |         |           |         |
| Th3      | 2          | 4          | 3          | 6          | 6      | 2      | 7      | 3      | 2    |     | 2   | 3   | 4    |           |                 |           |         |           |         |
| Th4      | 3          | 3          | 8          | 5          | 8      | 2      | 7      | 3      | 3    |     | 5   | 4   | 4    |           |                 |           |         |           |         |
| Th5      | 8          | 5          | 8          | 5          | 6      | 3      | 8      | 6      | 2    | 1   | 2   | 4   | 4    |           |                 |           |         |           |         |
| Th6      | 8          | 5          | 8          | 3          | 10     | 4      | 10     | 7      | 4    | 1   | 1   | 3   | 3    |           |                 |           |         |           |         |
| Th7      | 6          | 2          | 8          | 4          | 10     | 6      | 11     | 5      | 8    | 1   | 3   | 1   | 2    |           |                 |           |         |           |         |
| Th8      | 7          | 4          | 4          | 3          | 11     | 6      | 7      | 4      | 7    | 1   | 2   | 1   | 1    |           |                 |           |         |           |         |
| Th9      | 6          | 2          | 4          | 3          | 7      | 4      | 10     | 4      | 7    |     | 2   |     | 1    |           |                 |           |         |           |         |
| Th10     | 5          | 3          | 4          | 1          | 9      | 4      | 12     | 5      | 5    |     | 5   | 1   | 1    |           |                 |           |         |           |         |
| Th11     | 5          | 2          | 4          | 1          | 11     | 6      | 12     | 7      | 3    | 1   | 5   |     | 1    |           |                 |           |         |           |         |
| Th12     | 5          | 1          | 5          | 1          | 15     | 7      | 11     | 5      | 2    | 2   | 5   |     |      |           |                 |           |         |           |         |
| L1       | 5          |            | 2          |            | 10     | 5      | 8      | 5      | 1    | 2   |     |     |      |           |                 |           |         |           |         |
| L2       | 3          | 1          | 3          | 1          | 8      | 7      | 10     | 4      | 3    | 1   |     | 2   |      |           |                 |           |         |           |         |
| L3       | 3          |            | 2          | 2          | 7      | 6      | 10     | 5      | 3    | 1   |     | 2   |      |           |                 |           |         |           |         |
| L4       | 6          | 1          | 2          | 1          | 10     | 6      | 11     | 7      | 1    | 2   | 1   | 1   |      |           |                 |           |         |           |         |
| L5       | 3          | 1          | 2          | 3          | 12     | 5      | 14     | 5      |      |     | 1   | 1   |      |           |                 |           |         |           |         |
| S1       | 3          | 3          |            |            | 9      | 5      |        |        |      |     |     | 1   |      |           |                 |           |         |           |         |
| rsupil   |            |            |            |            |        |        |        |        |      |     |     |     |      | 12        | 9               | 14        |         |           |         |

|           |  |  |  |  |  |  |  |  |  |  |  |  |  |    |    |    |   |   |   |
|-----------|--|--|--|--|--|--|--|--|--|--|--|--|--|----|----|----|---|---|---|
| rinfil    |  |  |  |  |  |  |  |  |  |  |  |  |  | 12 | 13 | 16 |   |   |   |
| rsupsac   |  |  |  |  |  |  |  |  |  |  |  |  |  | 12 | 17 | 14 |   |   |   |
| rinsac    |  |  |  |  |  |  |  |  |  |  |  |  |  | 14 | 19 | 16 |   |   |   |
| lsupil    |  |  |  |  |  |  |  |  |  |  |  |  |  | 7  | 9  | 13 |   |   |   |
| linfil    |  |  |  |  |  |  |  |  |  |  |  |  |  | 11 | 11 | 16 |   |   |   |
| lsupsac   |  |  |  |  |  |  |  |  |  |  |  |  |  | 11 | 19 | 13 |   |   |   |
| linsac    |  |  |  |  |  |  |  |  |  |  |  |  |  | 12 | 17 | 17 |   |   |   |
| manubrium |  |  |  |  |  |  |  |  |  |  |  |  |  |    |    |    | 9 | 2 | 2 |

**Supplementary Figure 1: Bone marrow edema upper part SIJ, DISH, STIR sequence.**

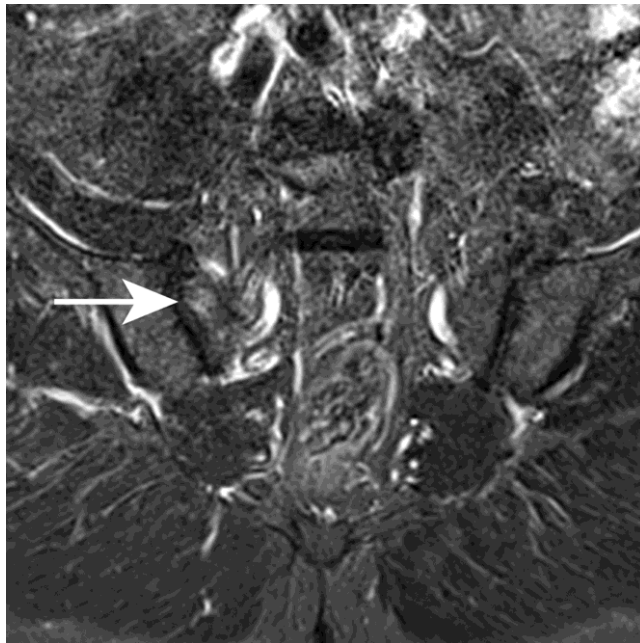

SIJ: sacroiliac joints; DISH: Diffuse Idiopathic Skeletal Hyperostosis; STIR: short-tau inversion recovery.

**Supplementary Figure 2: Ossification of upper portion of SIJ, DISH, CT scan.**

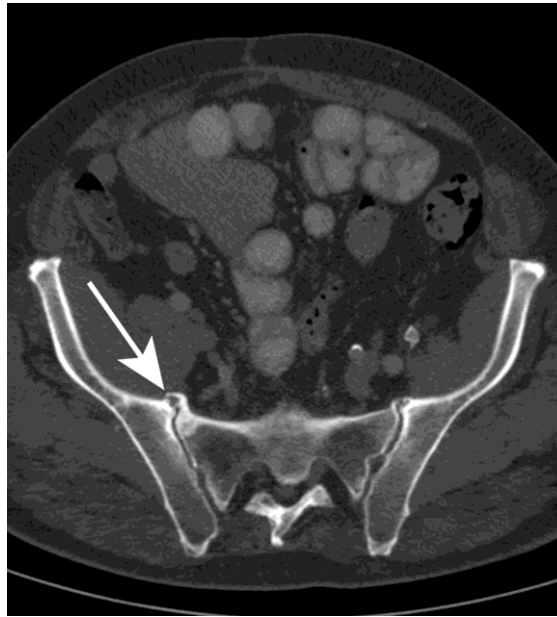

SIJ: sacroiliac joints; DISH: Diffuse Idiopathic Skeletal Hyperostosis; CT: computed tomography.

**Supplementary Figure 3: Acute inflammatory anterior corner lesions, AS, STIR sequence.**

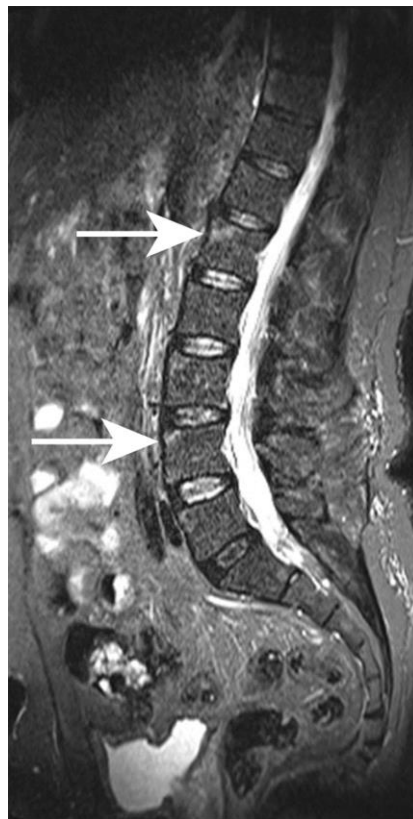

AS: ankylosing spondylitis; STIR: short-tau inversion recovery.
